# Supplementary material
Source: PubMed Central journal article supplement (PMC4790089)

### Supplementary figure 1

Posterior distributions of the covariate adjusted decitabine in combination with GO vs. historical treatment effect under the logistic regression model for response

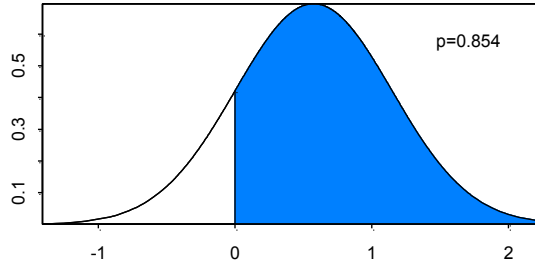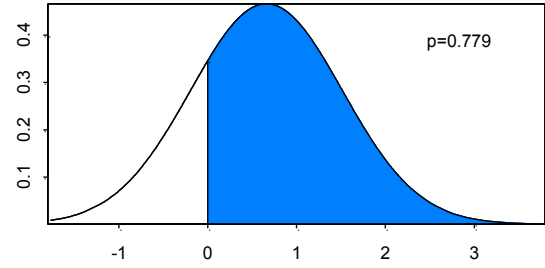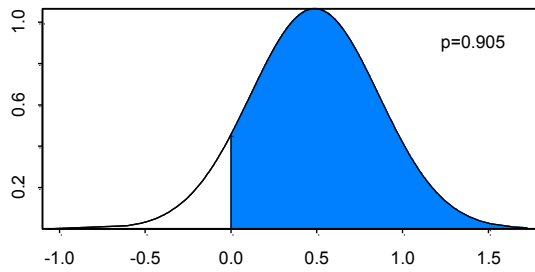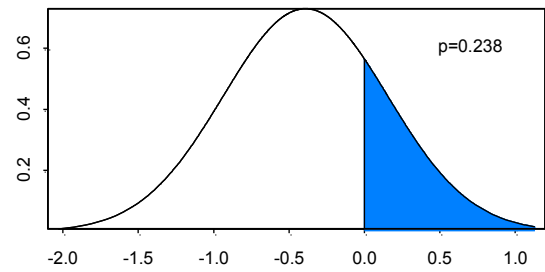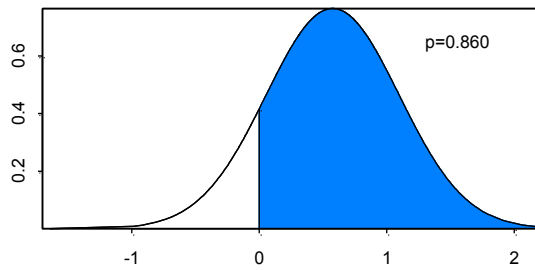

Supplement: NIHMS765855-supplement-Fig_1.pdf [file NIHMS765855-supplement-Fig_1.pdf]
