# Supplementary material
Source: PubMed Central journal article supplement (PMC4790089)

## Supplementary figure 2

Posterior distributions of the covariate adjusted decitabine in combination with GO vs. historical treatment effect under the Weibull regression model for OS

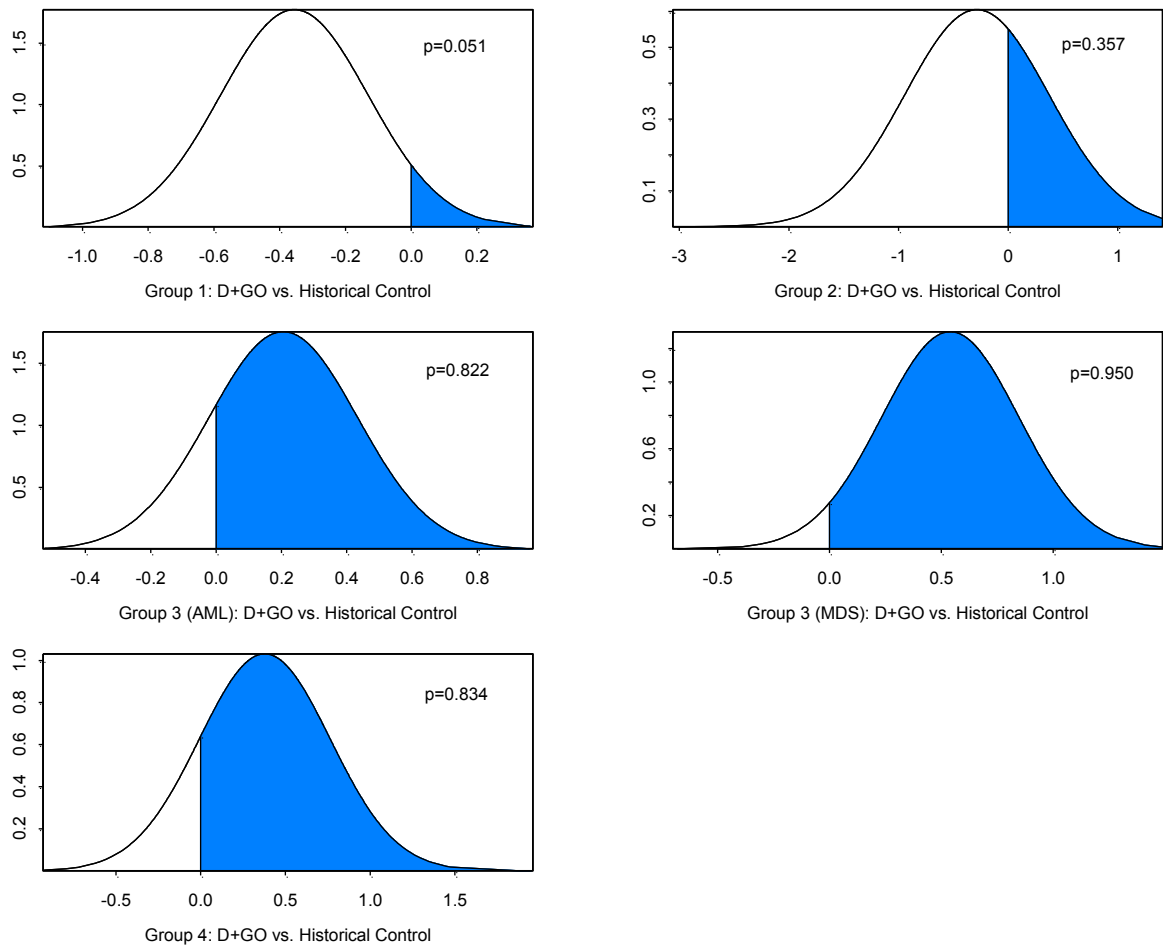

Supplement: NIHMS765855-supplement-Fig_2.pdf [file NIHMS765855-supplement-Fig_2.pdf]
